# Supplementary material
Source: PubMed Central journal article supplement (PMC8424661)
Supplement: NIHMS1703579-supplement-Supplemental_Figure_1.pdf [file NIHMS1703579-supplement-Supplemental_Figure_1.pdf]

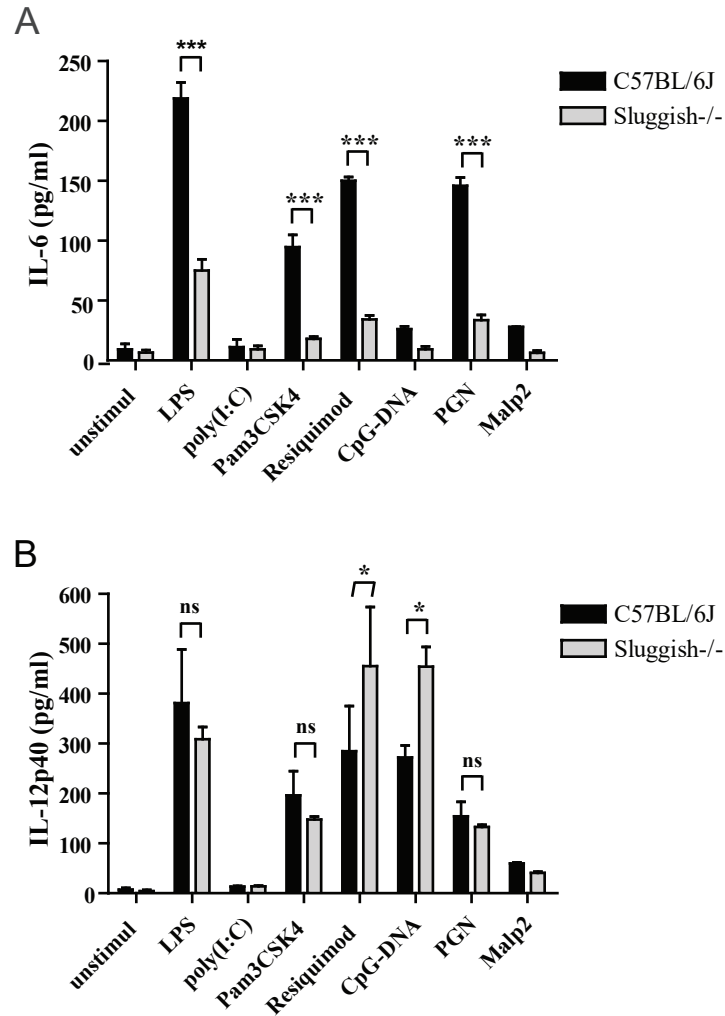

Supplemental Figure 1. Peritoneal macrophages were treated with various TLR ligands for 4 hours. The supernatants were collected for ELISA to determine the concentrations of IL-6 (left panel) and IL-12p40 (right panel).  $n=3$  mice per group. Data represent mean  $\pm$  SEM. \* =  $P < 0.05$ , \*\*  $P < 0.01$ , \*\*\*  $P < 0.005$ .
