# Supplementary material
Source: PubMed Central journal article supplement (PMC8424661)
Supplement: NIHMS1703579-supplement-Supplemental_Figure_2.pdf [file NIHMS1703579-supplement-Supplemental_Figure_2.pdf]

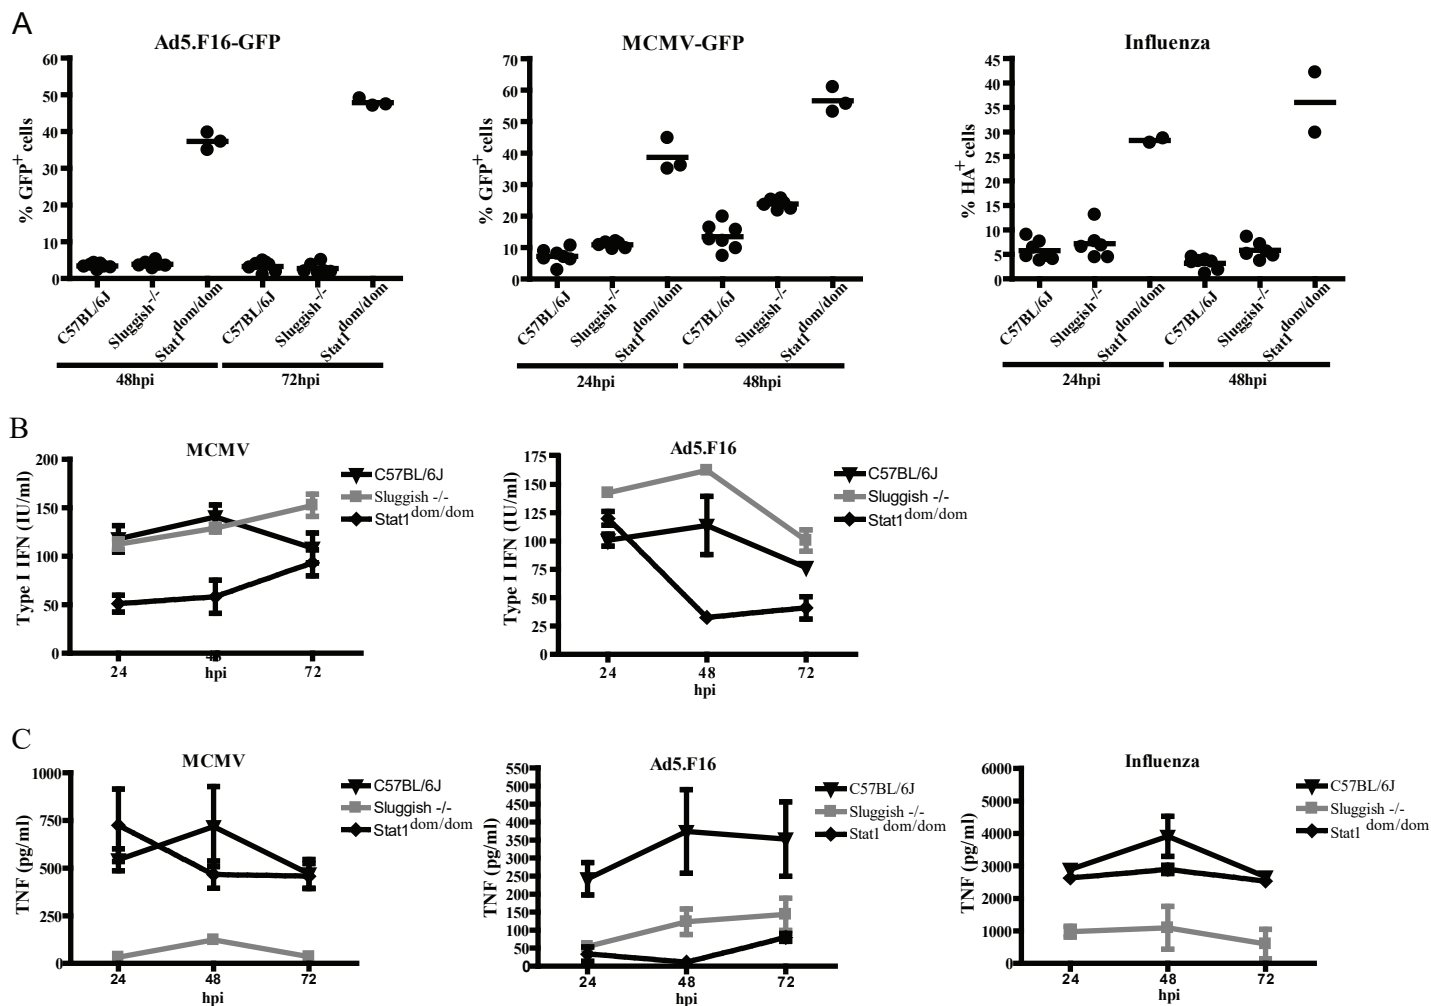

Supplemental Figure 2. Homozygous *Sluggish* macrophages are able to control viral infections. (A) Peritoneal macrophages from the indicated genotypes were infected with the indicated viruses, and the number of infected cells was determined based on GFP FACS analysis. C57BL/6J, n=3; *Sluggish*<sup>-/-</sup>, n=7. hpi = hours post-infection. (B) Supernatants from infected macrophages were subjected to TNF ELISA or IFN bioassay to determine the concentrations of TNF $\alpha$  or type I IFNs. C57BL/6J (black triangles), *Sluggish*<sup>-/-</sup> (gray squares), *Stat1*<sup>dom/dom</sup> (black diamonds). n=3 per group. hpi = hours post-infection. Data represent mean  $\pm$  SEM. \* = P < 0.05, \*\* P < 0.01, \*\*\* P < 0.005.
